1 **Physical activity and prevalence of constipation in Japanese young people**

2

3 Short title: Physical activity and constipation in Japan

4

5 Junichi Watanabe, RPT, PhD1\*, Shinya Furukawa, MD, PhD2\*, Yasunori Yamamoto, MD, PhD3,

6 Aki Kato, MD, PhD2, Katsunori Kusumoto, MD, PhD2, Eiji Takeshita, MD, PhD4, Yoshio Ikeda,

7 MD, PhD3, Naofumi Yamamoto, PhD5, Yuka Saeki, RN, PhD2,6, Teruki Miyake, MD, PhD7,

8 Osamu Yoshida, MD, PhD7 and Yoichi Hiasa, MD, PhD7

9

10 1 Department of Physical Therapy, Faculty of Health Sciences, Yamagata Prefectural University of

11 Health Sciences, Yamagata, Yamagata , Japan

12 2 Health Services Center, Ehime University, Matsuyama, Ehime, Japan

13 3 Endoscopy Center, Ehime University Hospital, Toon, Ehime, Japan

14 4 Department of Inflammatory Bowel Diseases and Therapeutics, Ehime University Graduate School

15 of Medicine, Ehime, Japan

16 5 Faculty of Collaborative Regional Innovation, Ehime University, Matsuyama, Ehime, Japan

17 6 Community Health Systems for Nursing, Ehime University Graduate School of Medicine, Toon,

18 Ehime, Japan

19 7 Department of Gastroenterology and Metabology, Ehime University Graduate School of Medicine,

20 Shitsukawa, Toon, Ehime, Japan

21

22 \* These authors made an equal contribution to this work and share first authorship.

23

24 **NOTE: This preprint reports new research that has not been certified by peer review and should not be used to guide clinical practice.**

1 Corresponding author:

2 Shinya Furukawa, MD, PhD

3 Health Services Center, Ehime University, Bunkyo, Matsuyama, Ehime 790-8577, Japan

4 Tel: +81-89-927-9198, Fax: +81-89-927-9196

5 Email: [shinya.furukawa@gmail.com](mailto:shinya.furukawa@gmail.com)

6

7 Word count: 2225words

8

9

10

11

12

13

14

15

16

17

18

19

20

21

22

23

24

1 **Abstract**

2 **Background :** Constipation is a very common medical issue among general humans worldwide. The  
3 association between physical activity (PA) and constipation is still inconsistent. Additionally, no  
4 evidence regarding this issue in young population.

5 **Aims :** This study aimed to evaluate the association between self-reported physical activity and  
6 constipation in Japanese young population, taking the presence or absence of an exercise partner as  
7 an additional variable.

8 **Methods:** The study subjects consisted of 12497 Japanese university students. Information on  
9 constipation, exercise frequency, exercise intensity, and exercise partners was obtained from a  
10 self-administered questionnaire. Age, sex, body mass index, drinking, smoking, anemia, and sports  
11 injury were selected as potential confounding factors.

12 **Results:** The prevalence of constipation was 6.5% in this cohort. Low, moderate, and high frequency  
13 of exercise was independently inversely associated with constipation (adjusted odds ratios [a OR]  
14 were low: a OR 0.77 [95% confidence interval (CI) 0.63–0.94], moderate: a OR 0.75 [95% CI  
15 0.60–0.94] and high: a OR 0.70 [95% CI 0.53–0.91], p for trend p=0.002). Low, moderate, and high  
16 intensity of exercise was independently inversely associated with constipation (low: a OR 0.77 [95%  
17 CI 0.62–0.97], moderate: a OR 0.77 [95% CI 0.63–0.95] and high: a OR 0.70 [95% CI 0.53–0.87], p  
18 for trend p=0.001). Exercise with groups and with friends was independently inversely associated  
19 with constipation whereas the association between exercising alone and constipation was not  
20 significant (groups: a OR 0.70 [95% CI 0.53–0.90] and friends: a OR 0.56 [95% CI 0.42–0.74])

21 **Conclusion:** In the young Japanese population, frequency and intensity of exercise and presence of  
22 exercise partner might be independently inversely associated with constipation.

23 **Keywords:** Partner · Exercise · Physical activity · functional constipation

## 1 **Introduction**

2 Constipation is a common gastrointestinal disorder among general humans worldwide. Previous  
3 report indicates that the prevalence of constipation ranges from 2.6% to 26.9% [1]. It is estimated  
4 that 70–90% of patients with constipation report bothersome symptoms such as bloating, straining,  
5 and hard stool persisting for many years, with a negative impact on health-related quality of life [2,3].  
6 Increased physical activity (PA) has long been recommended as part of the management of  
7 constipation. The association between PA and constipation has remained inconclusive to date. That  
8 is to say, the benefice of increasing daily physical exercise in the treatment of constipation have a  
9 lack of evidence. Several studies have showed an inverse association between PA and constipation.  
10 In Icelandic, Swedish, Hong Kong, two Chinese and three Japanese studies showed the inverse  
11 association between constipation, functional constipation, and PA [4-11]. On the other hand, In US,  
12 British, and two Spanish studies were no association between PA and constipation was found [12-15].  
13 Epidemiological evidence on this issue has been limited and inconsistent.

14 Exercise with others may have a stronger beneficial effect on health compared to exercise alone  
15 [16-20]. However, no study was to investigate the exercise partner and prevalence of constipation.  
16 To accumulate further evidence, we aimed to evaluate the association between self-reported physical  
17 activity and constipation in a Japanese young population.

18

## 19 **Materials and Methods**

### 20 *Study population*

21 In this study, we enrolled 12,523 students who had health examination at Ehime University (Ehime,  
22 Japan) between April 2015 and April 2017. A specific questionnaire pertaining to constipation was  
23 sent to all subjects at the time of their health checkup. After 26 subjects were excluded due to  
24 incomplete data, the final analysis sample in this study consisted of 12,497 subjects, all of whom

1 assessed for constipation and exercise habits.

2

### 3 **Ethics statement**

4 All subjects were provided an opt-out, and the study protocol was developed in accordance with the  
5 ethical guidelines of the Declaration of Helsinki. This study was approved by the ethics committee of  
6 The Ehime University Graduate School of Medicine (approval no. 1610012). All study participants,  
7 provided informed written consent prior to study enrollment This study did not include any minors.

8

### 9 **Measurements**

10 Information on smoking, drinking, and medical history was collected using a self-administered  
11 questionnaire. Current smoking was defined as positive if a study subject reported smoking. Current  
12 drinking was defined as positive if a study subject reported a habit of consuming alcoholic beverages.  
13 Height was measured to the nearest millimetre using a stadiometer with the subject standing  
14 completely erect. Weight was measured with the subject wearing light clothing. Body mass index  
15 (BMI) was calculated as weight in kilograms divided by height in meters squared.

16

### 17 **Assessment of exercise Habits, including presence/absence of exercise partners**

18 We used a self-administered questionnaire to estimate dietary intake using the following questions:  
19 (1) Frequency of exercise: “How frequently do you exercise?” (None, 1–2 times per month, 1–3  
20 times per week, and 4 or more times per week), (2) Intensity of exercise: “What is your main type of  
21 exercise?” (Light exercise [normal walking, housework, vehicles, ball playing, stretching, etc.],  
22 moderate exercise [fast walking, stairlifts, bicycle, softball, hiking, golf, radio calisthenics, etc.], and  
23 intense exercise [jogging, climbing stairs, badminton, tennis, mountain climbing, swimming, muscle  
24 training, judo, etc.]), and (3) Exercise partner: “Who do you mostly exercise with?” (group, friends,

1 and alone).

2

### 3 ***Assessment of constipation***

4 We used a self-administered questionnaire to estimate functional constipation using the following  
5 questions: Functional constipation was defined as present if the student answered “yes” to the  
6 question “Have you been constipated often recently?”

7

### 8 ***Statistical analysis***

9 (1) The frequency of exercise was divided into four categories: none (reference), low: 1–2 times per  
10 month, moderate: 1–3 times per week, and high: 4 or more times per week. (2) The intensity of  
11 exercise was divided four categories: none (reference), light exercise, moderate exercise, and high  
12 intense exercise. (3) The four categories of exercise partners were as follows: none (reference), with  
13 a group, with friends, and alone. Estimations of crude odds ratios (ORs) and their 95% confidence  
14 intervals (CIs) for constipation in relation to exercise frequency, exercise intensity, and exercise  
15 partners were performed using a logistic regression analysis. Multiple logistic regression analyses  
16 were used to adjust for potential confounding factors. Age, sex, BMI, drinking, smoking, anemia,  
17 and sport injury were selected as potential confounding factors. Statistical analyses were mainly  
18 performed using SAS software package version 9.4 (SAS Institute Inc., Cary, NC, USA). All  
19 probability values for statistical tests were two-tailed, and  $p < 0.05$  was considered statistically  
20 significant.

21

## 22 **Results**

### 23 **Subject Characteristics**

24 Table 1 shows the characteristics of the 12497 study participants. The percentage of men was 60.4%  
25 in this cohort. The mean age and BMI were 20.1 years, and 21.37, respectively. The frequency of

1 smoking and drinking were 5.4% and 10.0%, respectively. The prevalence of constipation was 6.5%  
2 in this cohort.

3

#### 4 **Association Between Exercise Habits and constipation**

5 Table 2 shows the crude and adjusted ORs and 95% CIs for constipation in relation to exercise habits.  
6 The prevalence of constipation among subjects with none, low, moderate, and high frequency of  
7 exercise were 7.3%, 4.5%, 4.2%, and 4.2%, respectively. After adjustment for age, sex, BMI,  
8 drinking, smoking, anemia, and sport injury, low, moderate, and high frequency of exercise was  
9 independently inversely associated with constipation, respectively (adjusted ORs were low: 0.77  
10 [95% CI 0.63–0.94], moderate: 0.75 [95% CI 0.60–0.94] and high: OR 0.70 [95% CI 0.53–0.91], p  
11 for trend p=0.002). The prevalence of constipation among low, moderate, and high intensity of  
12 exercise was 5.4%, 4.7%, and 3.2%, respectively. Low, moderate and high intensity of exercise was  
13 associated with constipation after adjustment for confounding factors, respectively (adjusted ORs  
14 were low: 0.77 [95% CI 0.62–0.97], moderate: 0.77 [95% CI 0.63–0.95] and high: OR 0.68 [95% CI  
15 0.53–0.87], p for trend p=0.001). The prevalence of constipation among exercise with groups, with  
16 friends, and alone was 3.8%, 3.0%, and 5.3%, respectively. Exercising with groups and friends was  
17 independently inversely associated with constipation (adjusted OR with groups:  
18 0.70 [95% CI 0.53–0.90] and with friends: OR 0.56 [95% CI 0.42–0.74]). The association between  
19 exercise alone and constipation was not significant.

20

#### 21 **Discussion**

22 In the present study, frequency and intensity of exercise and exercise partner were independently  
23 inversely associated with constipation in young Japanese population. To our knowledge, this is the  
24 first study to show an inverse association between exercise habit and constipation in the young

1 Japanese population.

2 Several studies regarding the association between physical activity and constipation have been  
3 reported. However, the association between physical activity and constipation was still inconsistent.

4 In a Swedish study of 15010 subjects aged 45-75 years, the leisure physical activity was  
5 significantly inversely associated with constipation [4]. In a Icelandic case control study of 190  
6 children aged 10 year to 18 years, subjects with high frequency of exercise (more than three times a  
7 week and/or for more than an hour) was lower onset of functional constipation compared to control  
8 patients [5]. In a Chinese study of 1,950 women aged over 50 years, frequency of physical exercise  
9 was significantly inversely associated with chronic constipation [6]. In an another Chinese study of  
10 1,698 women who were 37–41 weeks pregnant aged over 35 years, regular exercise was significantly  
11 inversely associated with functional constipation [7]. In a Hong Kong study of 32,371 subjects  
12 means aged 14.8 years, insufficient exercise was significantly associated with constipation [8]. In a  
13 Japanese cohort study of 10,658 subjects, higher physical activity was significantly inversely  
14 associated with functional constipation [9]. In a another Japanese study of 5540 adolescents aged 12  
15 to 13 years, physically inactive was significantly associated with constipation [10]. In the third  
16 Japanese study, 9,234 subjects aged over 18 years, poor physical activity was significantly associated  
17 with constipation [11].

18 On the other hand, physical activity was not associated with constipation in a US study of 1,069  
19 participants aged 24-77 years [12]. In a British study of 94 primiparous pregnant women aged 19-40  
20 years, no statistically significant differences were identified between light, moderate and vigorous  
21 physical activity levels when groups were compared between the constipated and non-constipated  
22 [13]. In a Spanish study of 414 participants aged over 50 years, physical activity was not associated  
23 with constipation [14]. In a another Spanish study of 415 participants aged 43.8 years, exercise habits  
24 were not related to constipation [15]. The discrepancies among these study results may be explained,



1 at least in part, by the differences in the definition of constipation, exercise intensity, race, sample  
2 size, study design, assessment of exercise, and age.

3 The underlying mechanism linking exercise and constipation remains unclear. In particular, the  
4 mechanism underlying the beneficial effect of exercising with others remains poorly understood.  
5 Additionally, physical activity may enhance intestinal gas clearance [21]. Exercise habits might  
6 improve the prevalence of constipation by preventing acid reflux, enhancing intestinal gas clearance,  
7 and suppressing inflammatory cytokines. Physical activity has been shown to have variable effects  
8 on gastrointestinal transit. Physical activity has been shown to have variable effects on  
9 gastrointestinal transit. Physical activity promotes bowel movements by improving frequency of  
10 bowel activity in the large intestine [22, 23]. In addition, physical activity may change the level of  
11 endogenous sex hormones [24], which have been shown to regulate colonic transit time [25].  
12 Physical activity may stimulate appetite, and sufficient dietary intake leads to higher frequency of  
13 bowel movement [26]. Exercising with friends and groups might improve functional constipation by  
14 reducing depressive symptoms. Further study on the mechanism, especially the association between  
15 exercising with others and functional constipation, is needed in the future.

16 Several limitations of the present study warrant mention. First, the cross-sectional nature of the  
17 study does not permit the assessment of causality owing to the uncertain temporality of the  
18 association. Second, data on functional constipation in our study was self-reported. We could not  
19 estimate gastrointestinal transit time or rectal anal pressure. Therefore, it was not possible to assess  
20 the severity of constipation. Similarly, data on participants' exercise habits was self-reported. The  
21 assessment of participants' exercise habits based on self-administered questionnaire in the present  
22 study might not be able to assess the actual physical activity., which might have caused some  
23 misclassification bias. However, non-differential misclassification would cause a bias of the odds  
24 ratio towards the null. Finally, the patients in the current study might not be representative of the

1 young Japanese population. Given that the present cohort consisted only of university students, it is  
2 possible that the relatively high educational status of our population affected health behaviors. In a  
3 previous internet study of subjects 40 year older using similar simple questionnaire on constipation,  
4 the prevalence of constipation was 51.5% [27].

5 In conclusion, in the young Japanese population, the frequency and intensity of exercise were  
6 independently inversely associated with functional constipation. The inverse association between  
7 exercise habits and functional constipation was found in subjects who exercise with friends and in  
8 groups but not alone.

9

## 10 **Funding**

11 This research did not receive any specific grant from funding agencies in the public, commercial, or  
12 not-for-profit sectors.

13

## 14 **Author Contributions:**

15 **Conceptualization:** Junichi Watanabe, Shinya Furukawa

16 **Data curation:** Junichi Watanabe, Shinya Furukawa

17 **Formal analysis:** Junichi Watanabe, Shinya Furukawa

18 **Investigation:** Aki Kato, Katsunori Kusumoto, Yuka Saeki

19 **Methodology:** Junichi Watanabe, Shinya Furukawa

20 **Project administration:** Shinya Furukawa, Yoichi Hiasa

21 **Resources:** Shinya Furukawa, Yoichi Hiasa

22 **Software:** Junichi Watanabe, Shinya Furukawa

23 **Supervision:** Yoichi Hiasa

24 **Validation:** Yasunori Yamamoto, Eiji Takeshita, Yoshio Ikeda, Teruki Miyake, Osamu Yoshida,

1 Naofumi Yamamoto

2 **Visualization:** Yasunori Yamamoto, Eiji Takeshita, Yoshio Ikeda, Teruki Miyake, Osamu

3 Yoshida, Aki Kato, Katsunori Kusumoto, Yuka Saeki, Naofumi Yamamoto

4 **Writing – original draft:** Junichi Watanabe, Shinya Furukawa

5 **Writing – review & editing:** Junichi Watanabe, Shinya Furukawa, Yoichi Hiasa

6

7 **Declaration of competing interest**

8 The authors declare no conflicts of interest

9

10 **Acknowledgments**

11 The authors would like to acknowledge Mikage Oiwa, Hiromi Miyauchi, Yuko Matsumoto, Takako

12 Yamamoto, Hiroko Suzuki, Miyuki Kataoka, Masumi Hino, Tomo Kogama and all of the Health

13 Services Center staff for their support.

14

15

16

17

18

19

20

21

22

23

24

1  
2  
3  
4  
5  
6  
7  
8  
9  
10  
11  
12  
13  
14  
15  
16  
17  
18  
19  
20  
21  
22  
23  
24

## References

1. Schmidt FM, Santos VL. Prevalence of constipation in the general adult population: an integrative review. *J Wound Ostomy Continence Nurs.* 2014; 41: 70-76.  
<https://doi.org/10.1097/01.WON.0000438019.21229.b7> PMID: 24378694
2. Johanson JF, Kralstein J. Chronic constipation: a survey of the patient perspective. *Aliment Pharmacol Ther.* 2007; 25: 599–608. <https://doi.org/10.1111/j.1365-2036.2006.03238.x> PMID: 17305761
3. Talley NJ, Weaver AL, Zinsmeister AR, Melton LJ 3rd. Onset and disappearance of gastrointestinal symptoms and functional gastrointestinal disorders. *Am J Epidemiol.* 1992; 136: 165–177. <https://doi.org/10.1093/oxfordjournals.aje.a116483> PMID: 1415139
4. Seidenfaden S, Ormarsson OT, Lund SH, Bjornsson ES. Physical activity may decrease the likelihood of children developing constipation. *Acta Paediatr* 2018; 107: 151-155.  
<https://doi.org/10.1111/apa.14067> PMID: 28898506
5. Ohlsson B, Manjer J. Physical inactivity during leisure time and irregular meals are associated with functional gastrointestinal complaints in middle-aged and elder subjects. *Scand J Gastroenterol.* 2016; 51: 1299-1307. <https://doi.org/10.1080/00365521.2016.1209786> PMID: 27435884
6. Huang L, Jiang H, Zhu M, Wang B, Tong M, Li H, et al. Prevalence and Risk Factors of Chronic Constipation Among Women Aged 50 Years and Older in Shanghai, China. *Med Sci Monit,* 2017; 23: 2660-2667. <https://doi.org/10.12659/msm.904040> PMID: 28562581
7. Shi W, Xu X, Zhang Y. Epidemiology and Risk Factors of Functional Constipation in Pregnant

- 1 Women. PLoS One. 2015; 10: e0133521. <https://doi.org/10.1371/journal.pone.0133521> PMID:  
2 26208169
- 3 8. Huang R, Ho S-Y, Lo W-S, Lam T-H. Physical activity and constipation in Hong Kong  
4 adolescents. PLoS One. 2014; 9: e90193. <https://doi.org/10.1371/journal.pone.0090193>. PMID:  
5 24587274
- 6 9. Otani K, Watanabe T, Takahashi K, Nadatani Y, Fukunaga S, Hosomi S, et al. Prevalence and  
7 risk factors of functional constipation in the Rome IV criteria during a medical check-up in Japan.  
8 J Gastroenterol Hepatol. 2021; 36 : 2157-2164. <https://doi.org/10.1111/jgh.15436> PMID:  
9 33555082
- 10 10. Yamada M, Sekine M, Tatsuse T, Fujimura Y. Lifestyle, psychological stress, and incidence of  
11 adolescent constipation: results from the Toyama birth cohort study. BMC Public Health. 2021,  
12 21, 47. <https://doi.org/10.1186/s12889-020-10044-5> PMID: 33407297
- 13 11. Harada M, Tsuboyama-Kasaoka N, Yonekura Y, Shimoda H, Ogawa A, Kobayashi S, et al.  
14 Associations Between Lifestyle Factors and Constipation Among Survivors After the Great East  
15 Japan Earth-quake: A 9-year Follow-up Study. J Epidemiol. 2023, Online ahead of print.  
16 <https://doi.org/10.2188/jea.JE20220284> PMID: 37635084
- 17 12. Tuteja AK, Joos NJ, Hickam JV. Is constipation associated with decreased physical activity in  
18 normally active subjects? Am J Gastroenterol. 2005; 100: 124-129.  
19 <https://doi.org/10.1111/j.1572-0241.2005.40516.x> PMID: 15654791
- 20 13. Derbyshire E, Davies J, Costarelli V, Dettmar P. Diet, physical inactivity and the prevalence of  
21 constipation throughout and after pregnancy. Matern Child Nutr. 2006; 2: 127-134.  
22 <https://doi.org/10.1111/j.1740-8709.2006.00061.x> PMID: 16881925
- 23 14. Cara MA, López PJ, Oliver MC, López JM, Rodríguez AC, Albero JS, et al. Constipation in the  
24 population over 50 years of age in Albacete province. Rev Esp Enferm Dig. 2006; 98: 449-459.  
25 <https://doi.org/10.4321/s1130-01082006000600006> PMID: 16948544

- 1 15. Santacruz CC, López MO, García MV, Pérez CF, Miguel JC. Do bad habits bring a double  
2 constipation risk? *Turk J Gastroenterol.* 2018; 29: 580-587.  
3 <https://doi.org/10.5152/tjg.2018.17533> PMID: 30260781
- 4 16. Takeda F, Noguchi H, Monma T, Tamiya N. How possibly do leisure and social activities impact  
5 mental health of middle-aged adults in Japan?: an evidence from a national longitudinal survey.  
6 *PLoS One*, 2015; 10: e0139777. <https://doi.org/10.1371/journal.pone.0139777> PMID: 26431536
- 7 17. Seino S, Kitamura A, Tomine Y, Tanaka I, Nishi M, Taniguchi Y, et al. Exercise Arrangement is  
8 associated with physical and mental health in older adults. *Med Sci Sports Exerc*, 2019; 51:  
9 1146-1153. <https://doi.org/10.1249/MSS.0000000000001884> PMID: 30694973
- 10 18. Kanamori S, Takamiya T, Inoue S, Kai Y, Kawachi I, Kondo K. Exercising alone versus with  
11 others and associations with subjective health status in older Japanese: The JAGES Cohort Study.  
12 *Sci Rep*, 2016; 6: 39151. <https://doi.org/10.1038/srep39151> PMID: 27974855
- 13 19. Maleki BH, Tartibian B. High-intensity exercise training for improving reproductive function in  
14 infertile patients: a randomized controlled trial. *J Obstet Gynaecol Can*, 2017; 39: 545-558.  
15 <https://doi.org/10.1016/j.jogc.2017.03.097> PMID: 28625282
- 16 20. Furukawa S, Yamamoto Y, Watanabe J, Kato A, Kusumoto K, Takeshita E, et al. Frequency,  
17 intensity, and partner of exercise habit is inversely associated with functional dyspepsia in young  
18 Japanese population. *Dig Dis Sci*, 2022 ; 6: 2293-2298.  
19 <https://doi.org/10.1007/s10620-021-07017-y> PMID: 33945062
- 20 21. Dainese R, Serra JS, Azpiroz F, Malagelada JR. Effects of physical activity on intestinal gas  
21 transit and evacuation in healthy subjects. *Am J Med.* 2004; 116: 536–539.  
22 <https://doi.org/10.1016/j.amjmed.2003.12.018> PMID: 15063815
- 23 22. De Schryver AM, Keulemans YC, Peters HP, Akkermans LM, Smout AJ, De Vries, et al. Effects  
24 of regular physical activity on defecation pattern in middle-aged patients complaining of chronic

- 1        constipation. *Scand J Gastroenterol* 2005; 40: 422-429.
- 2        <https://doi.org/10.1080/00365520510011641> PMID: 16028436
- 3        23. Muller-Lissner SA, Kamm MA, Scarpignato C, Wald A. Myths and misconceptions about  
4        chronic constipation. *Am J Gastroenterol* 2005; 100: 232-242.
- 5        <https://doi.org/10.1111/j.1572-0241.2005.40885.x> PMID: 15654804
- 6        24. Chan MF, Dowsett M, Folkerd E, Bingham S, Wareham N, Luben R, et al. Usual physical  
7        activity and endogenous sex hormones in postmenopausal women: the European prospective  
8        investigation into cancer-norfolk population study. *Cancer Epidemiol Biomarkers Prev* 2007; 16:  
9        900-905. <https://doi.org/10.1158/1055-9965.EPI-06-0745> PMID: 17507613
- 10       25. Chiarelli P, Brown W, McElduff P. Constipation in Australian women: prevalence and  
11       associated factors. *Int Urogynecol J Pelvic Floor Dysfunct* 2000; 11: 71-78.
- 12       <https://doi.org/10.1007/s001920050073> PMID: 10805262
- 13       26. Blundell JE, Stubbs RJ, Hughes DA, Whybrow S, King NA. Cross talk between physical activity  
14       and appetite control: does physical activity stimulate appetite? *Proc Nutr Soc* 2003; 62: 651-661.
- 15       <https://doi.org/10.1079/PNS2003286> PMID: 14692601
- 16       27. Kasugai K, Yamamoto S, Kawamura Y, Adachi K, Yamaguchi Y, Tamura Y, et al. Internet  
17       survey of the actual situation of constipation in Japanese general population REACTION—J :  
18       Research for Actual Situation of Constipation in the Japanese. *Journal of Japanese Society of*  
19       *Gastroenterology*. 2019; 116(11): 913-926. (in Japanese)
- 20       <https://doi.org/10.11405/nisshoshi.116.913>

Table 1. Clinical characteristics of 12497 study participants

|                             | Total (n=12497)  |
|-----------------------------|------------------|
| Age, years, mean $\pm$ SD   | 20.1 $\pm$ 3.1   |
| Sex (Male/Female)           | 7546/4951        |
| BMI                         | 21.37 $\pm$ 3.08 |
| Smoking, %                  | 669 (5.4)        |
| Drinking, %                 | 1253 (10.0)      |
| Medical history             |                  |
| Heart murmur, %             | 70 (0.6)         |
| ECG abnormality, %          | 17 (0.1)         |
| Anemia, %                   | 370 (3.0)        |
| Traffic accident, %         | 167 (1.3)        |
| Sport Injury, %             | 424 (3.4)        |
| Exercise habit, %           |                  |
| Frequency of exercise habit |                  |
| None, %                     | 3940 (31.5)      |
| 1-2 times/month, %          | 3704 (29.6)      |
| 1-3 times/week, %           | 3077 (24.6)      |
| 4 or more times/week, %     | 1776 (14.2)      |
| Intensity of exercise       |                  |
| None, %                     | 3940 (31.5)      |
| Light exercise, %           | 2130 (17.0)      |
| Moderate exercise, %        | 3248 (26.0)      |
| Intense exercise, %         | 3179 (25.4)      |
| Exercise with               | 659 (5.3)        |
| None, %                     | 3940 (31.5)      |
| Groups, %                   | 2242 (17.9)      |
| Friends, %                  | 2040 (16.3)      |
| Alone, %                    | 4275 (34.2)      |
| Constipation, %             | 659 (6.5)        |

medRxiv preprint doi: <https://doi.org/10.1101/2024.01.09.24301858>; this version posted January 26, 2024. The copyright holder for this preprint (which was not certified by peer review) is the author/funder, who has granted medRxiv a license to display the preprint in perpetuity. It is made available under a [CC-BY 4.0 International license](https://creativecommons.org/licenses/by/4.0/).



Table 2. Crude and adjusted odds ratios and 95% confidence intervals for constipation in relation to exercise habits

| Variable                    | Prevalence (%) | Crude OR (95% CI) | Adjusted OR (95% CI) |
|-----------------------------|----------------|-------------------|----------------------|
| Constipation                |                |                   |                      |
| Frequency of exercise habit |                |                   |                      |
| None, %                     | 289/3940 (7.3) | 1.00              | 1.00                 |
| 1-2 times/month, %          | 167/3704 (4.5) | 0.60 (0.49–0.73)  | 0.77 (0.63–0.94)     |
| 1-3 times/week, %           | 128/3077 (4.2) | 0.55 (0.44–0.68)  | 0.75 (0.60–0.94)     |
| 4 or more times/week, %     | 75/1776 (4.2)  | 0.56 (0.43–0.72)  | 0.70 (0.53–0.91)     |
| <i>p</i> for trend          |                |                   | 0.002                |
| Intensity of exercise       |                |                   |                      |
| None, %                     | 289/3940 (7.3) | 1.00              | 1.00                 |
| Light exercise, %           | 115/2130 (5.4) | 0.72 (0.58–0.90)  | 0.77 (0.62–0.97)     |
| Moderate exercise, %        | 153/3248 (4.7) | 0.63 (0.51–0.76)  | 0.77 (0.63–0.95)     |
| Intense exercise, %         | 102/3179 (3.2) | 0.42 (0.33–0.53)  | 0.68 (0.53–0.87)     |
| <i>p</i> for trend          |                |                   | 0.001                |
| Exercise with               |                |                   |                      |
| None, %                     | 289/3940(7.3)  | 1.00              | 1.00                 |
| Groups, %                   | 84/2242 (3.8)  | 0.49 (0.38–0.63)  | 0.70 (0.53–0.90)     |
| Friends, %                  | 61/2040 (3.0)  | 0.39 (0.29–0.51)  | 0.56 (0.42–0.74)     |
| Alone, %                    | 225/4275 (5.3) | 0.70 (0.59–0.84)  | 0.84 (0.70–1.02)     |

Odds ratios were adjusted for age, sex, body mass index, drinking, smoking, anemia, and sport injury. OR, odds ratio; CI, confidence interval

Table 3. Crude and adjusted odds ratios and 95% confidence intervals for constipation in relation to exercise partner.

| Variable      | Prevalence (%) | Crude OR (95% CI) | Adjusted OR (95% CI)* | Adjusted OR (95% CI)** |
|---------------|----------------|-------------------|-----------------------|------------------------|
| Constipation  |                |                   |                       |                        |
| Exercise with |                |                   |                       |                        |
| None, %       | 289/3940(7.3)  | 1.00              | 1.00                  | 1.00                   |
| Groups, %     | 84/2242 (3.8)  | 0.49 (0.38–0.63)  | 0.70 (0.53–0.90)      | 0.78 (0.46–1.33)       |
| Friends, %    | 61/2040 (3.0)  | 0.39 (0.29–0.51)  | 0.56 (0.42–0.74)      | 0.61 (0.39–0.96)       |
| Alone, %      | 225/4275 (5.3) | 0.70 (0.59–0.84)  | 0.84 (0.70–1.02)      | 0.95 (0.64–1.38)       |

OR, odds ratio; CI, confidence interval

\*Model 1: Odds ratios were adjusted for age, sex, body mass index, drinking, smoking, anemia, and sport injury.

\*\*Model 2: Odds ratios were adjusted for age, sex, body mass index, drinking, smoking, anemia, sport injury, exercise frequency, and exercise intensity.
